# Supplementary material for: Anti-tumor macrophages activated by ferumoxytol combined or surface-functionalized with the TLR3 agonist poly (I : C) promote melanoma regression
Source: PubMed Central journal article supplement — Theranostics. 2018 Nov 29;8(22):6307–21. doi: 10.7150/thno.29746 (PMC6299704; doi:10.7150/thno.29746), 2018-11-29
Supplement: thnov08p6307s1.pdf [file thnov08p6307s1.pdf]

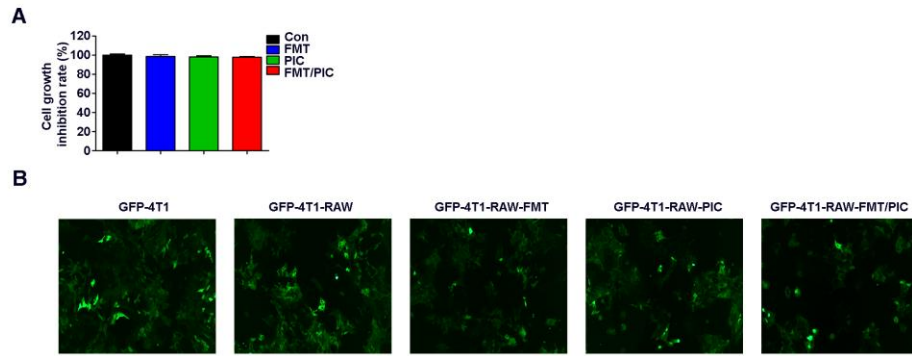

**Figure S1. Combined effect of FMT and PIC on 4T1 tumor cells in a co-culture system.** (A) 4T1 cells were incubated with FMT, PIC, or FMT/PIC for 48 h and cell viability was analyzed using CCK-8 assay. (B) GFP-4T1 cells co-cultured with RAW 264.7 (RAW) at a ratio of 2:1 were incubated with FMT, PIC, or FMT/PIC for 48 h and the fluorescence intensity of GFP was measured.

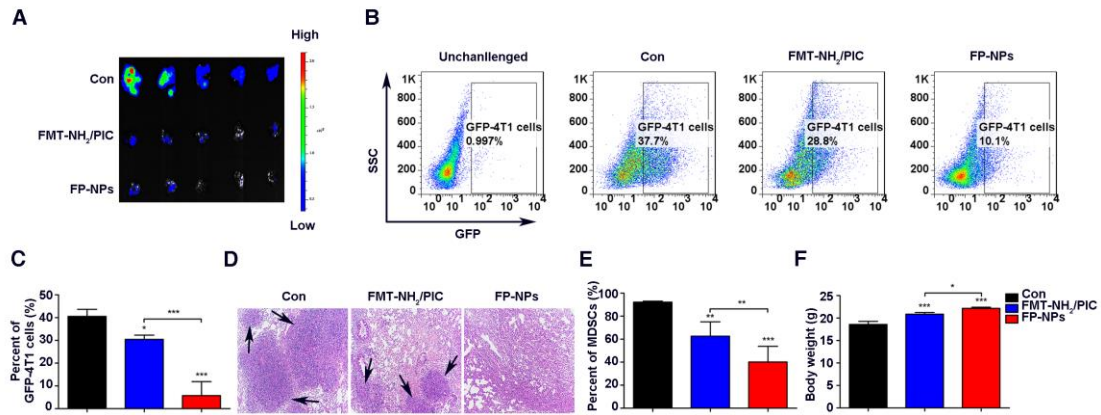

**Figure S2. Therapeutic benefits of FP-NPs for lung metastasis of breast cancer.**

BALB/c mice bearing lung metastasis were prepared by intravenously injecting with  $5 \times 10^5$  GFP-4T1 cells overnight and were intravenously treated with PBS, FP-NPs (FMT-NH<sub>2</sub> 200  $\mu$ g composited with PIC 10  $\mu$ g), and FMT-NH<sub>2</sub> (200  $\mu$ g) combined with PIC (10  $\mu$ g) every other day for three times. (A) *Ex vivo* bioluminescence of GFP-4T1 metastatic lungs with the indicated treatment. (B) FCM analysis of GFP<sup>+</sup> live singlets in lung tissues of GFP-4T1 metastatic mice with the indicated treatment. (C) Corresponding quantitative GFP<sup>+</sup> live singlets displayed in (B). (D) Histopathologic analyses of H&E-stained lung tissue sections in tumor-bearing mice with the indicated treatment. (E) FCM analysis of MDSC populations in the blood of GFP-4T1 lung metastatic mice with the indicated treatment. (F) Body weight of GFP-4T1 lung metastatic mice with the indicated treatment.

**Table S1. Sequences of forward and reverse primers used for PCR amplification**

| <b>Gene</b>         | <b>Primer Sequence</b>                                             |
|---------------------|--------------------------------------------------------------------|
| Mouse iNOS          | Forward: GGAGTGACGGCAAACATGACT<br>Reverse: TCGATGCACAACCTGGGTGAAC  |
| Mouse TNF- $\alpha$ | Forward: CCCTCACACTCAGATCATCTTCT<br>Reverse: GCTACGACGTGGGCTACAG   |
| Mouse Arg-1         | Forward: CTCCAAGCCAAAGTCCTTAGAG<br>Reverse: AGGAGCTGTCATTAGGGACATC |
| Mouse CD86          | Forward: TGTTTCCGTGGAGACGCAAG<br>Reverse: TTGAGCCTTTGTAAATGGGCA    |
| Mouse CD206         | Forward: CTCTGTTCAGCTATTGGACGC<br>Reverse: CGGAATTTCTGGGATTCAGCTTC |
| Mouse GAPDH         | Forward: TGGCCTTCCGTGTTCTAC<br>Reverse: GAGTTGCTGTTGAAGTCGCA       |
